# Supplementary material
Source: PubMed Central journal article supplement (PMC3281533)
Supplement: supp_en.2011-1665_EN-11-1665Table_S1.pdf [file supp_en.2011-1665_EN-11-1665Table_S1.pdf]

## Supplemental Table 1

| Figure 7 panel | Brain Region | <i>Pomc</i> -GFP  | P-STAT3      | <i>Pomc</i> -Cre;R26R-TOM | Double Label  |               | Triple Label        |
|----------------|--------------|-------------------|--------------|---------------------------|---------------|---------------|---------------------|
|                |              |                   |              |                           | GFP + P-STAT3 | TOM + P-STAT3 | GFP + P-STAT3 + TOM |
| A              | ARH          | 18 ± 4            | 65 ± 4       | 97 ± 13                   | 7 ± 3         | 54 ± 2        | 54 ± 2              |
| B              | ARH*         | 55 ± 6 <i>Npy</i> | 65 ± 4       | 97 ± 13                   | 40 ± 5*       | 54 ± 2        | 30 ± 6*             |
| C              | PBN          | 1 ± 3             | no detection | 14 ± 4                    | NA            | NA            | NA                  |
| D              | AP           | 12 ± 4            | 19 ± 4       | 20 ± 3                    | 3 ± 1         | 12 ± 4        | 1 ± 1               |
| E              | NTS          | 21 ± 2            | 26 ± 6       | 7 ± 2                     | 10 ± 1        | 1 ± 3         | 1 ± 2               |

\**Npy* FISH counts in place of *Pomc*-GFP

**Table S1: Peptidergic identities of leptin-sensing neurons in the ARH and brainstem.** Cells counts from leptin-injected *Pomc*-eGFP ;*Pomc*-Cre;R26R-TOM animals shown in Figure 7.
